# Supplementary material for: Highly chemo- and regio-selective [2 + 2 + 2] cycloaddition of unsymmetrical 1,6-diynes with terminal alkynes catalyzed by Cp*Ru(cod)Cl under mild conditions
Source: Royal Society of Chemistry journal article supplement (doi:10.1039/b000466i), 2000-01-01
Supplement: b000466i.doc [file b000466i.doc]

**Supplementary information**

**Experimental Procedures**

**General.** 1H and 13C NMR spectra were obtained for samples in CDCl3 solution. Flash chromatography was performed with a silica gel column (Merck Silica gel 60) eluted with mixed solvents [hexane / ethyl acetate]. Elemental analyses were performed by the Microanalytical Center of Kyoto University. Melting points were obtained in sealed capillary tubes and are uncorrected. 1,2-Dichloroethane was distilled from CaH2, and degassed. RuCl3.xH2O was purchased from N. E. Chemcat Corporation. Cp*Ru(cod)Cl (**1**) was obtained according to the literature procedures.

**General Procedure for Cp*Ru(cod)Cl-Catalyzed Cycloaddition.**  To a solution of a monoalkyne **3** (1.0 mmol) and Cp*Ru(cod)Cl (**1**) (3.6 mg, 0.01 mmol) in dry degassed 1,2-dichloroethane (2 mL) were added a solution of a diyne 2 or 5 (0.5 mmol) in dry degassed 1,2-dichloroethane (3 mL) under Ar atmosphere at room temperature (0 ˚C for acetylene). The reaction mixture was stirred for the specified time in Table 1 and Table 2. The solvent was then evaporated and the crude product was purified by silica-gel flash column chromatography to give a coupling product **4** or **6**. The yields and the isomer ratios were summarized in Table 1 and Table 2.

**Analytical Data for 4a**: oil (eluent Hexane-AcOEt 10 : 1); IR (neat) 1737 (CO2Me) cm-1; 1H NMR (300 MHz)  0.92 (3 H, t, *J*=7.2 Hz), 1.34 (2 H, m), 1.56 (2 H, m), 2.56 (2 H, t, *J*=7.5 Hz), 3.57 (4 H, s), 3.74 (6 H, s), 6.98 (1 H, d, *J*=7.5 Hz), 7.01 (1 H, s), 7.09 (1 H, d, *J*=7.5 Hz); 13C NMR (75 MHz)  9.6, 18.0, 29.5, 31.1, 35.9, 36.2, 48.5, 56.0, 119.3, 119.6, 122.6, 132.4, 135.3, 137.2, 167.6; MS (FAB) *m*/*z* (rel. intensity) 291 (MH+, 100), 230 (100), 187 (97), 129 (94); Anal Calcd for C17H22O4: C, 70.32; H, 7.64. Found: C, 70.11; H, 7.73.

**Analytical Data for 4b**: mp. 70-71 ˚C (eluent Hexane-AcOEt 10 : 1); IR (CHCl3) 1733 (CO2Me) cm-1; 1H NMR (300 MHz)  3.64 (2 H, s), 3.66 (2 H, s), 3.77 (6 H, s), 7.20-7.60 (8 H, m); 13C NMR (75 MHz)  40.4, 40.6, 53.0, 60.5, 122.9, 124.4, 126.1, 126.9, 127.0, 128.6, 138.9, 140.3, 140.4, 141.1, 171.9; MS (FAB) *m*/*z* (rel. intensity) 310 (M+, 66), 250 (61), 191 (61), 154 (100), 136 (98); Anal Calcd for C19H18O4: C, 73.53; H, 5.85. Found: C, 73.30; H, 5.92.

**Analytical Data for 4c**: mp. 55-56 ˚C (eluent Hexane-AcOEt 30 : 1); IR (CHCl3) 1733 (CO2Me) cm-1; 1H NMR (300 MHz)  1.30 (9 H, s), 3.58 (2 H, s), 3.60 (2 H, s), 3.75 (6 H, s), 7.12 (1 H, d, *J*=8.4 Hz), 7.21 (1 H, d, *J*=8.4 Hz), 7.22 (1 H, s); 13C NMR (75 MHz)  31.6, 34.6, 40.3, 40.8, 52.9, 60.4, 121.0, 123.5, 124.0, 136.6, 139.5, 150.0, 172.0; MS (FAB) *m*/*z* (rel. intensity) 291 (MH+, 99), 231 (71), 215 (45), 154 (100), 136 (74); Anal Calcd for C17H22O4: C, 70.32; H, 7.64. Found: C, 70.20; H, 7.56.

**Analytical Data for 4d**: mp. 65-66 ˚C (eluent Hexane-AcOEt 10 : 1); IR (CHCl3) 1733 (CO2Me) cm-1; 1H NMR (300 MHz)  3.60 (4 H, s), 3.75 (6 H, s), 7.14-7.22 (4 H, m); 13C NMR (75 MHz)  40.6, 53.0, 60.3, 124.1, 126.8, 139.7, 171.9; MS (FAB) *m*/*z* (rel. intensity) 235 (MH+, 43), 203 (20), 174 (20), 154 (100), 136 (76); Anal Calcd for C13H14O4: C, 66.66; H, 6.02. Found: C, 66.58; H, 6.02.

**Analytical Data for 4e**: mp. 70-72 ˚C (eluent Hexane-AcOEt 10 : 1); IR (CHCl3) 1346, 1162 (NTs) cm-1; 1H NMR (300 MHz)  0.91 (3 H, t, *J*=7.5 Hz), 1.32 (2 H, m), 1.55 (2 H, m), 2.40 (3 H, s), 2.57 (2 H, t, *J*=7.5 Hz), 4.59 (4 H, s), 6.98-7.10 (3 H, m), 7.31 (2 H, d, *J*=7.8 Hz), 7.78 (2 H, d, *J*=7.8 Hz); 13C NMR (75 MHz)  13.9, 21.5, 22.3, 33.8, 35.4, 53.5, 53.6, 122.2, 122.3, 127.4, 127.8, 129.6, 133.1, 133.6, 136.0, 142.6, 143.4; MS (FAB) *m*/*z* (rel. intensity) 330 (MH+, 71), 154 (100), 136 (100); Anal Calcd for C19H23NO2S: C, 69.27; H, 7.04; N, 4.25. Found: C, 69.28; H, 7.05; N, 4.02.

**Analytical Data for 4f**: oil (eluent Hexane-AcOEt 25 : 1); 1H NMR (300 MHz)  0.94 (3 H, t, *J*=7.2 Hz), 1.37 (2 H, m), 1.60 (2 H, m), 2.63 (2 H, t, *J*=7.5 Hz), 5.09 (4 H, s), 7.06 (1 H, s), 7.08 (1 H, d, *J*=7.8 Hz), 7.14 (1 H, d, *J*=7.8 Hz); 13C NMR (75 MHz)  14.0, 22.4, 34.0, 35.6, 73.4, 73.5, 120.5, 120.7, 127.4, 136.3, 139.2, 142.1; MS (FAB) *m*/*z* (rel. intensity) 175 (M+, 100), 154 (50), 136 (51). This compound is unstable and decompose slowly even at -15 ˚C. 　Thus, elemental analysis was omitted.

**Analytical Data for *meta*-6a**: oil (eluent Hexane-AcOEt 40 : 1); IR (neat) 1738 (CO2Me) cm-1; 1H NMR (300 MHz)  0.91 (3 H, t, *J*=7.5 Hz), 1.34 (2 H, m), 1.56 (2 H, m), 2.22 (3 H, s), 2.52 (2 H, t, *J*=7.5 Hz), 3.50 (2 H, s), 3.58 (2 H, s), 3.75 (6 H, s), 6.80 (1 H, s), 6.84 (1 H, s); 13C NMR (75 MHz)  14.1, 19.1, 22.5, 34.0, 35.5, 39.2, 40.8, 52.9, 60.0, 121.4, 128.0, 133.2, 135.8, 139.5, 142.0, 172.1; MS (FAB) *m*/*z* (rel. intensity) 305 (MH+, 58), 245 (49), 154 (100), 136 (73); Anal Calcd for C18H24O4: C, 71.03; H, 7.95. Found: C, 70.99; H, 7.99.

**Analytical Data for *meta*-6b**: oil (eluent Hexane-AcOEt 45 : 1); IR (neat) 1738 (CO2Me) cm-1; 1H NMR (300 MHz)  2.22 (3 H, s), 2.28 (3 H, s), 3.49 (2 H, s), 3.57 (2 H, s), 3.75 (6 H, s), 6.81 (1 H, s), 6.85 (1 H, s); 13C NMR (75 MHz)  19.0, 21.2, 39.2, 40.7, 52.9, 60.0, 122.0, 128.6, 133.3, 135.6, 136.8, 139.6, 172.1; MS (FAB) *m*/*z* (rel. intensity) 263 (MH+, 58), 202 (95), 143 (100); Anal Calcd for C16H20O5: C, 65.74; H, 6.90. Found: C, 65.75; H, 6.88.

**Analytical Data for *meta*-6c**: oil (eluent Hexane-AcOEt 8 : 1); IR (neat) 1738 (CO2Me) cm-1; 1H NMR (300 MHz)  2.25 (3 H, s), 3.37 (3 H, s), 3.51 (2 H, s), 3.60 (2 H, s), 3.75 (6 H, s), 4.37 (2 H, s), 6.95 (1 H, s), 7.00 (1 H, s); 13C NMR (75 MHz)  19.0, 39.3, 40.7, 53.0, 58.1, 60.0, 74.7, 120.9, 127.5, 133.6, 137.2, 138.2, 139.8, 172.0; MS (FAB) *m*/*z* (rel. intensity) 291 (M-H+, 44), 261 (72), 232 (60), 201 (100); Anal Calcd for C15H18O4: C, 68.69; H, 6.92. Found: C, 68.84; H, 7.06.

**Analytical Data for *meta*-6d**: mp. 79-81 ˚C (eluent Hexane-AcOEt 10 : 1); IR (CHCl3) 1738 (CO2Me) cm-1; 1H NMR (300 MHz)  2.33 (3 H, s), 3.59 (2 H, s), 3.68 (2 H, s), 3.78 (6 H, s), 7.23 (1 H, s), 7.26 (1 H, s), 7.28-7.60 (5 H,m); 13C NMR (75 MHz)  19.2, 39.3, 40.8, 53.0, 60.0, 120.3, 126.8, 126.9, 127.0, 128.5, 133.8, 137.8, 140.1, 140.6, 141.2, 172.0, 172.1; MS (FAB) *m*/*z* (rel. intensity) 324 (M+, 28), 307 (28), 265 (21), 205 (19), 154 (100), 136 (99); Anal Calcd for C18H24O4: C, 71.03; H, 7.95. Found: C, 70.99; H, 7.99.

**Analytical Data for *meta*-6e**: oil (eluent Hexane-AcOEt 30 : 1); IR (neat) 1738 (CO2Me) cm-1; 1H NMR (300 MHz)  0.94 (3 H, t, *J*=7.5 Hz), 1.38 (2 H, m), 1.62 (2 H, m), 2.63 (2 H, t, *J*=7.5 Hz), 3.64 (24 H, s), 3.73 (6 H, s), 7.04 (2 H, br s), 7.25-7.45 (5 H,m); 13C NMR (75 MHz)  14.1, 22.5, 33.9, 35.6, 40.1, 40.7, 52.9, 60.4, 123.1, 126.9, 127.7, 128.2, 128.3, 134.6, 137.9, 140.5, 140.7, 142.3, 171.9; MS (FAB) *m*/*z* (rel. intensity) 367 (MH+, 55), 307 (55), 154 (100), 136 (99); Anal Calcd for C23H26O4: C, 75.39; H, 7.15. Found: C, 75.28; H, 7.25.

**Analytical Data for *meta*-6f**: oil (eluent Hexane-AcOEt 20 : 1); IR (neat) 1739 (CO2Me), 1250 (SiMe3) cm-1; 1H NMR (300 MHz)  0.30 (9 H, s), 0.93 (3 H, t, *J*=7.5 Hz), 1.37 (2 H, m), 1.57 (2 H, m), 2.56 (2 H, t, *J*=7.5 Hz), 3.55 (2 H, s), 3.59 (2 H, s), 3.74 (6 H, s), 7.02 (1 H, s), 7.10 (1 H, s); 13C NMR (75 MHz)  -0.7, 14.1, 22.6, 34.0, 35.7, 40.1, 41.3, 52.9, 60.7, 124.9, 132.7, 134.9, 139.0, 140.9, 142.2, 172.0; MS (FAB) *m*/*z* (rel. intensity) 363 (MH+, 100), 303 (100), 259 (54), 231 (65); Anal Calcd for C20H30O4Si: C, 66.26; H, 8.34. Found: C, 66.10; H, 8.49.

**Analytical Data for *meta*-6g**: mp. 59-60 ˚C (eluent Hexane-AcOEt 12 : 1); IR (CHCl3) 1348, 1165 (NTs) cm-1; 1H NMR (300 MHz)  0.90 (3 H, t, *J*=7.5 Hz), 1.31 (2 H, m), 1.53 (2 H, m), 2.18 (3 H, s), 2.41 (3 H, s), 2.53 (2 H, t, *J*=7.5 Hz), 4.52 (2 H, s), 4.60 (2 H, s), 6.81 (1 H, s), 6.84 (1 H, s), 7.31 (2 H, d, *J*=8.2 Hz) , 7.78 (2 H, d, *J*=8.2 Hz); 13C NMR (75 MHz)  14.0, 18.7, 21.6, 22.4, 33.9, 35.4, 52.9, 54.0, 119.6, 127.5, 128.7, 129.6, 132.2, 132.3, 133.7, 135.8, 143.0, 143.4; MS (FAB) *m*/*z* (rel. intensity) 342 (M+-H, 100), 188 (50), 154 (92), 136 (69); Anal Calcd for C20H25NO2S: C, 69.94; H, 7.34; N, 4.08. Found: C, 70.09; H, 7.30; N, 3.96.

**Analytical Data for *meta*-6g**: oil (eluent Hexane-AcOEt 40 : 1); 1H NMR (300 MHz)  0.94 (3 H, t, *J*=7.2 Hz), 1.36 (2 H, m), 1.59 (2 H, m), 2.22 (3 H, s), 2.59 (2 H, t, *J*=7.2 Hz), 5.06 (2 H, s), 5.10 (2 H, s), 6.88 (2 H, s); 13C NMR (75 MHz)  14.1, 18.6, 22.5, 34.1, 35.5, 72.9, 74.0, 117.9, 128.3, 130.9, 135.3, 138.9, 142.5; MS (FAB) *m*/*z* (rel. intensity) 189 (M+-H, 100), 154 (19), 136 (16). This compound is unstable and decomposes slowly even at -15 ˚C. Thus, elemental analysis was omitted.
